# Supplementary material for: Understanding Mental Health System Governance in India: Perspectives of Key Stakeholders
Source: Preprints.org preprint supplement (doi:10.20944/preprints202005.0276.v1), 2020-05-16
Supplement: Supplementary file 1 [file supplementary]

Supplementary file: Tables

**Understanding mental health system governance in India: perspectives of key stakeholders**

Shalini Ahuja\*, Rahul Shidhaye, Mark Jordans, Azaz Khan, Tessa Roberts, Graham Thornicroft and Inge Petersen

**Table 1: Governance framework**

| Principle                           | Sub Themes                                                                                                                                                                 |
|-------------------------------------|----------------------------------------------------------------------------------------------------------------------------------------------------------------------------|
| 1. Rule of Law                      | Legislative process; interpretation of legislation to regulation and policy; enforcement of laws and regulations.                                                          |
| 2. Strategic Direction              | Long-term vision; comprehensive development strategy including health.                                                                                                     |
| 3. Effectiveness and Responsiveness | Quality and capacity of human resources for implementation. Availability of financial mechanisms to ensure implementation, medicine availability, infrastructure presence. |
| 4. Participation and Collaboration  | Participation in decision-making processes; stakeholder identification.                                                                                                    |
| 5. Equity, Inclusiveness            | Equity and fair financing of mental health care/health care; disparities in health.                                                                                        |
| 6. Ethics and Oversight             | Principles of bioethics; health care and research ethics.                                                                                                                  |
| 7. Information systems              | Information generation, collection, analysis, dissemination and use (includes routine health management information systems).                                              |
| 8. Accountability and Transparency  | Internal and external accountability; transparency in decision-making; transparency in allocation of resources; data transparency.                                         |

**Table 2: Number and type of respondents**

| Respondent group                                                                                                                                                                                                    | Role in Mental Health Systems/<br>Health Systems                           | Number of respondents contacted<br>(n=46) | Number of Respondents<br>(n=33) |
|---------------------------------------------------------------------------------------------------------------------------------------------------------------------------------------------------------------------|----------------------------------------------------------------------------|-------------------------------------------|---------------------------------|
| National                                                                                                                                                                                                            |                                                                            | 25                                        |                                 |
| Members of national mental health policy group.<br><br>3 out of 6 were leading or representation a service user/ care giver organisation.                                                                           | Developing national mental health policy                                   |                                           | 6                               |
| Consultants–Health, Ministry of health and Family Welfare National Health Systems Resource Centre (NHSRC), National Institute of Health and Family Welfare, Scientist C, Institute of Clinical and Medical research | Appraising programme implementation plans, Ethics committee member         |                                           | 13                              |
| State                                                                                                                                                                                                               |                                                                            | 14                                        |                                 |
| Consultants, Directorate of Health Services                                                                                                                                                                         | Preparing Programme Implementation Plans                                   |                                           | 5                               |
| Deputy Director, Human Resource, National Rural Health Mission (NRHM)                                                                                                                                               | Health Management Information System expert                                |                                           | 1                               |
| Programme Managers, Non-Communicable Diseases.                                                                                                                                                                      | Co-ordination for National Programme for Prevention and Control of Cancer, |                                           | 6                               |

|                                                    |                                                                                      |   |   |
|----------------------------------------------------|--------------------------------------------------------------------------------------|---|---|
|                                                    | Diabetes,<br>Cardiovascular<br>Diseases and Stroke                                   |   |   |
| District                                           |                                                                                      | 7 |   |
| In-charge Medical Officer, Community Health Centre | Arranging and rendering curative services, co-ordination for national health mission |   | 2 |
